# Supplementary material for: CRISPR Cas12a-enabled biosensors coupled with commercial pregnancy test strips for the visible point-of-care testing of SARS-CoV-2
Source: Royal Society of Chemistry journal article supplement (doi:10.1039/d3an00284e), 2023-01-01
Supplement: d3an00284e1.pdf [file d3an00284e1.pdf]

## Supporting information

# CRISPR Cas12a-enabled biosensors coupled with commercial pregnancy test strips for the visible point-of-care testing of SARS-CoV-2

Peijie Shen,<sup>a,b</sup> Zhenjun Si,<sup>c</sup> Di Huang,<sup>a,b</sup> Zhipeng Xu,<sup>d,\*</sup> Ziyi Wang,<sup>a,b</sup> Mengjun Fang,<sup>a,b</sup>  
Zhinan Xu<sup>a,b,\*</sup>

<sup>a</sup> *Key Laboratory of Biomass Chemical Engineering of Ministry of Education, College of Chemical and Biological Engineering, Zhejiang University, Hangzhou 310027, China.*

<sup>b</sup> *Institute of Biological Engineering, College of Chemical and Biological Engineering, Zhejiang University, Hangzhou 310027, China.*

<sup>c</sup> *Hangzhou FasTech Biotechnology Company Limited, Hangzhou 310005, China.*

<sup>d</sup> *The First Affiliated Hospital, School of Medicine, Zhejiang University, Hangzhou 310027, China.*

\*Correspondence:

Prof. Zhinan Xu, Institute of Biological Engineering, College of Chemical and Biological Engineering, Zhejiang University, Hangzhou 310027, China.

E-mail: [znxu@zju.edu.cn](mailto:znxu@zju.edu.cn)

Dr. Zhipeng Xu, The First Affiliated Hospital, School of Medicine, Zhejiang University, Hangzhou 310027, China.

E-mail: [11618267@zju.edu.cn](mailto:11618267@zju.edu.cn)

## Content

|                                                                                                        |           |
|--------------------------------------------------------------------------------------------------------|-----------|
| <b>Figure S1.</b> Schematic diagram of CRISPR-PTS assay.....                                           | <b>3</b>  |
| <b>Figure S2.</b> Established CRISPR-fluorescence assay without amplification .....                    | <b>4</b>  |
| <b>Figure S3.</b> RT-RAA primer optimization .....                                                     | <b>5</b>  |
| <b>Figure S4.</b> Feasibility of CRISPR-PTS assay .....                                                | <b>6</b>  |
| <b>Figure S5.</b> Optimization of hCG-modified beads added volume in CRISPR-PTS assay .....            | <b>7</b>  |
| <b>Figure S6.</b> Optimization of Cas12a/crRNA final concentration in CRISPR-PTS assay .....           | <b>8</b>  |
| <b>Figure S7.</b> Optimization of cleavage time in CRISPR-PTS assay.....                               | <b>9</b>  |
| <b>Figure S8.</b> Genome sequence alignment of SARS-CoV and SARS-CoV-2 .....                           | <b>10</b> |
| <b>Figure S9.</b> RT-qPCR standard curve of SARS-CoV-2 pseudovirus spiked throat swab samples .....    | <b>11</b> |
| <b>Figure S10.</b> Comparison between strips from different brands using CRISPR-PTS assay .....        | <b>12</b> |
| <b>Table S1.</b> Oligonucleotides used in this study .....                                             | <b>13</b> |
| <b>Table S2.</b> Validation of CRISPR-PTS assay using spiked throat swab samples .....                 | <b>16</b> |
| <b>Table S3.</b> Comparison between CRISPR-PTS assay and RT-qPCR on various detection parameters ..... | <b>19</b> |

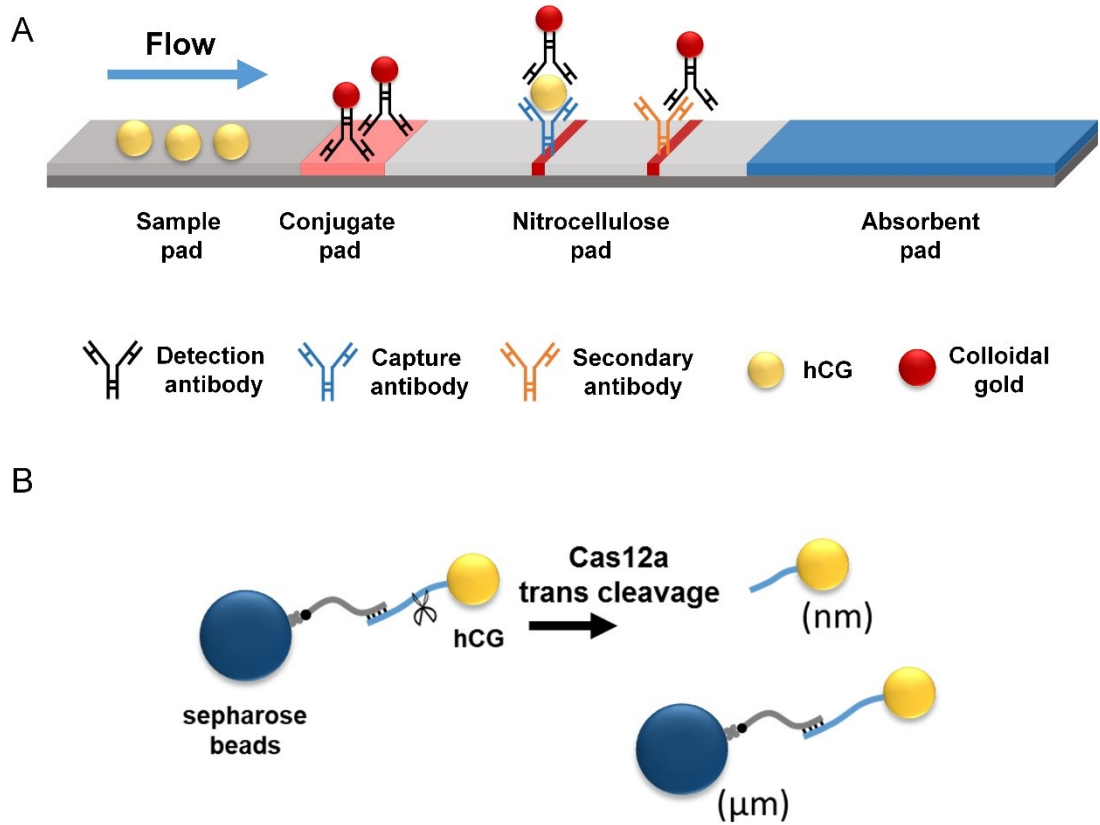

**Figure S1.** Schematic diagram of CRISPR-PTS assay. (A) Principle of the pregnancy test strip (PTS) assay. (B) Schematic diagram of CRISPR Cas12a-based ssDNA cleavage. The hCG was released from sepharose beads after Cas12a *trans*-cleavage and could be detected by PTS.

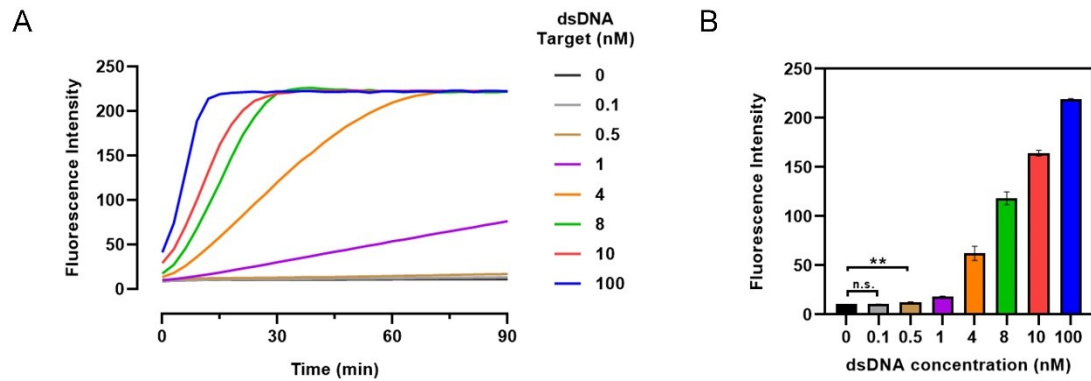

**Figure S2.** Established CRISPR-fluorescence assay without amplification. (A) Reaction kinetics of SARS-CoV-2 E1 site tested by CRISPR-fluorescence system. The dsDNA was diluted to different final concentrations as targets and the fluorescence was measured every 3 min (the curves showed the mean of three repeated measurements collected every 3 min by a 384-well plate reader). (B) Sensitivity of the CRISPR-fluorescence assay for SARS-CoV-2 E1 site at 15 min (each column was the average of three repeated measurements; error bars represented the mean  $\pm$  S.D.; \*\* $p < 0.01$  in “Student’s t test”).

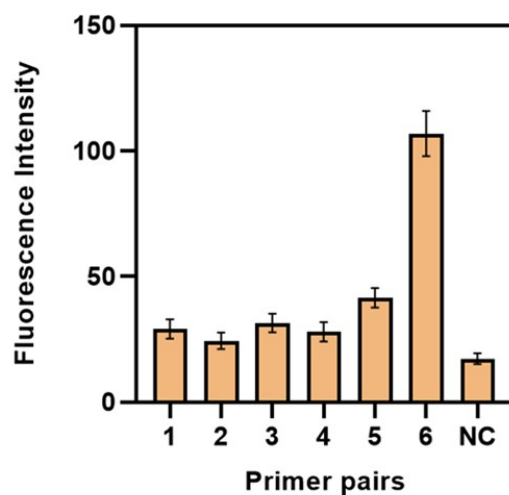

**Figure S3.** RT-RAA primer optimization. Six different primer combinations were tested in this section and primer pair 6 containing E1-RT-RAA-R2 and E1-RT-RAA-6F showed the highest amplification efficiency (CRISPR-fluorescence assay was used in this part; fluorescence intensity was measured at 15 min; pseudovirus concentration was 5 copies/ $\mu$ L; each column was the average of three repeated measurements; error bars represented the mean  $\pm$  S.D.; NC: without any primer addition).

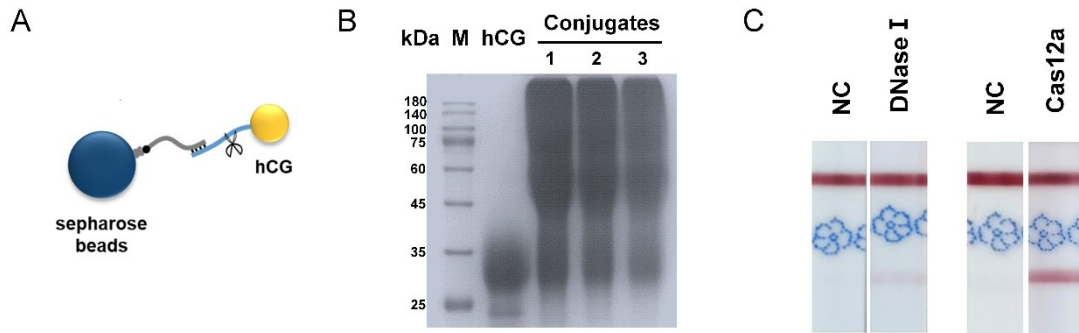

**Figure S4.** Feasibility of CRISPR-PTS assay. (A) Schematic diagram of CRISPR Cas12a-mediated ssDNA cleavage. (B) SDS-PAGE analysis of hCG and ssDNA conjugate (the theoretical molecular weight of hCG was 36 kDa and the larger molecular weight bands in line 1, 2 and 3 represented the hCG-ssDNA conjugate). (C) Feasibility test of CRISPR-PTS assay. The hCG-modified streptavidin sepharose beads were respectively treated (or not) by DNase I (10 U) and Cas12a (with crRNA, and 100 nM target) followed by immersing the strip into the reaction mixture.

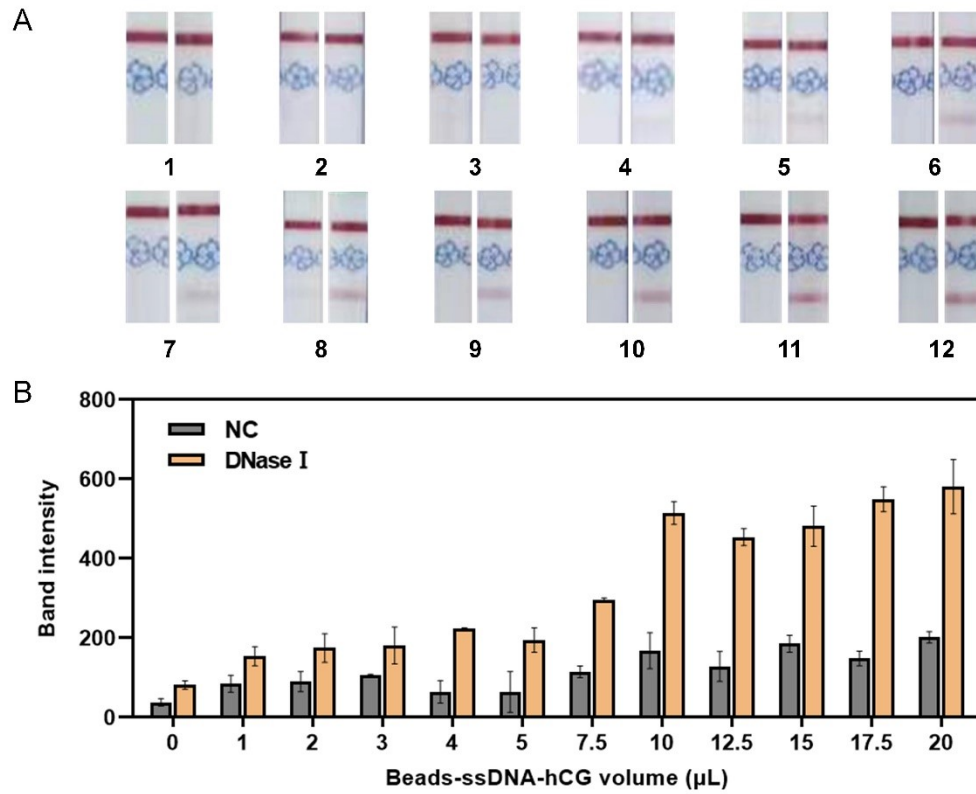

**Figure S5.** Optimization of hCG-modified beads added volume in CRISPR-PTS assay. (A) Comparison of band intensity observed by unaided eyes between different groups. No. 1 to No. 12 represented experimental groups with beads adding volume ranging from 0 to 20  $\mu\text{L}$ , respectively (left: NC; right: DNase I). (B) Comparison of band intensity observed by a test strip reader between different groups. This cleavage system contained 0.5 U/ $\mu\text{L}$  RNase inhibitor, 1 $\times$ NEBuffer2.1 and different amount of hCG-modified beads, treated by DNase I or not (NC) for 1 hour at 37  $^{\circ}\text{C}$  (each column was the average of three repeated measurements; error bars represented the mean  $\pm$  S.D.).

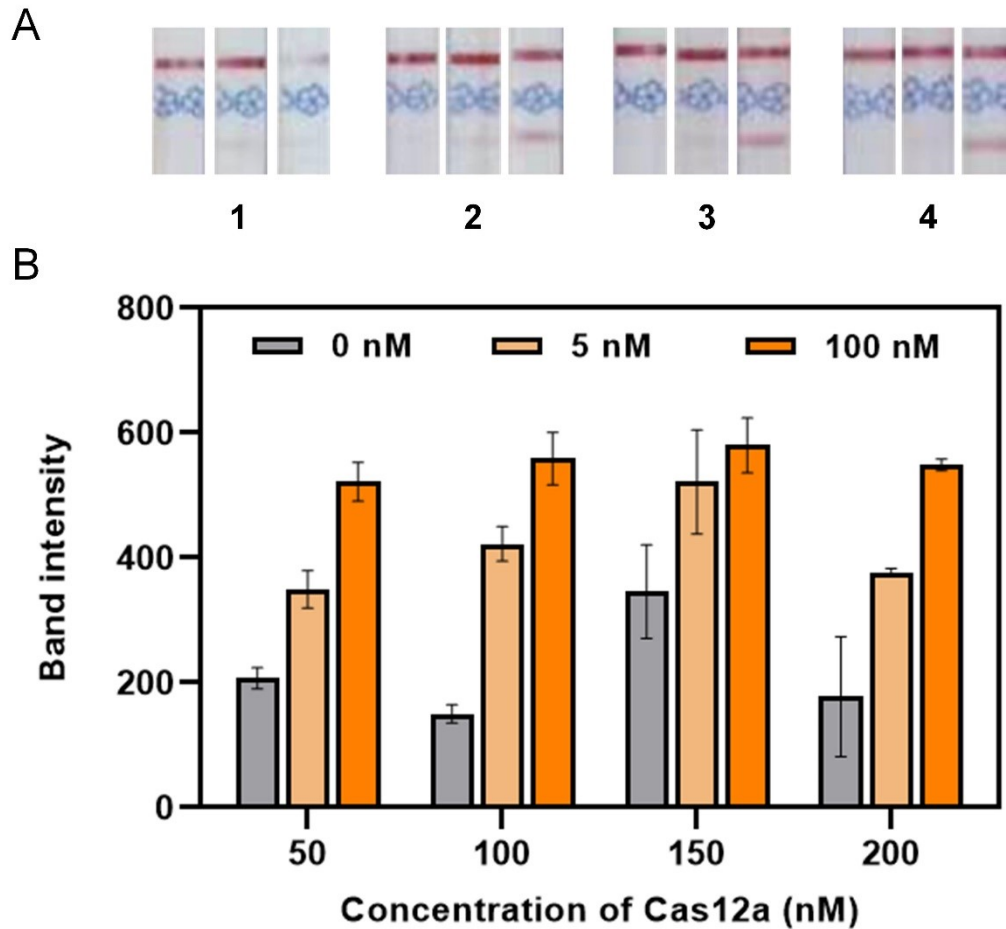

**Figure S6.** Optimization of Cas12a/crRNA final concentration in CRISPR-PTS assay. (A) Comparison of band intensity observed by unaided eyes between different groups. No. 1 to No. 4 represented experimental groups with Cas12a final concentrations ranging from 50 to 200 nM, respectively (left: 0 nM dsDNA target; middle: 5 nM dsDNA target; right: 100 nM dsDNA target). (B) Comparison of band intensity observed by a test strip reader between different groups. This cleavage system contained 0.5 U/ $\mu$ L RNase inhibitor, 1 $\times$ NEBuffer2.1 and 20  $\mu$ L hCG-modified beads, treated by different amount of Cas12a/crRNA (molar ratio=1:2) for 1 hour at 37  $^{\circ}$ C. Three different kinds of dsDNA concentrations were tested in this experiment as mocked target (each column was the average of three repeated measurements; error bars represented the mean  $\pm$  S.D.).



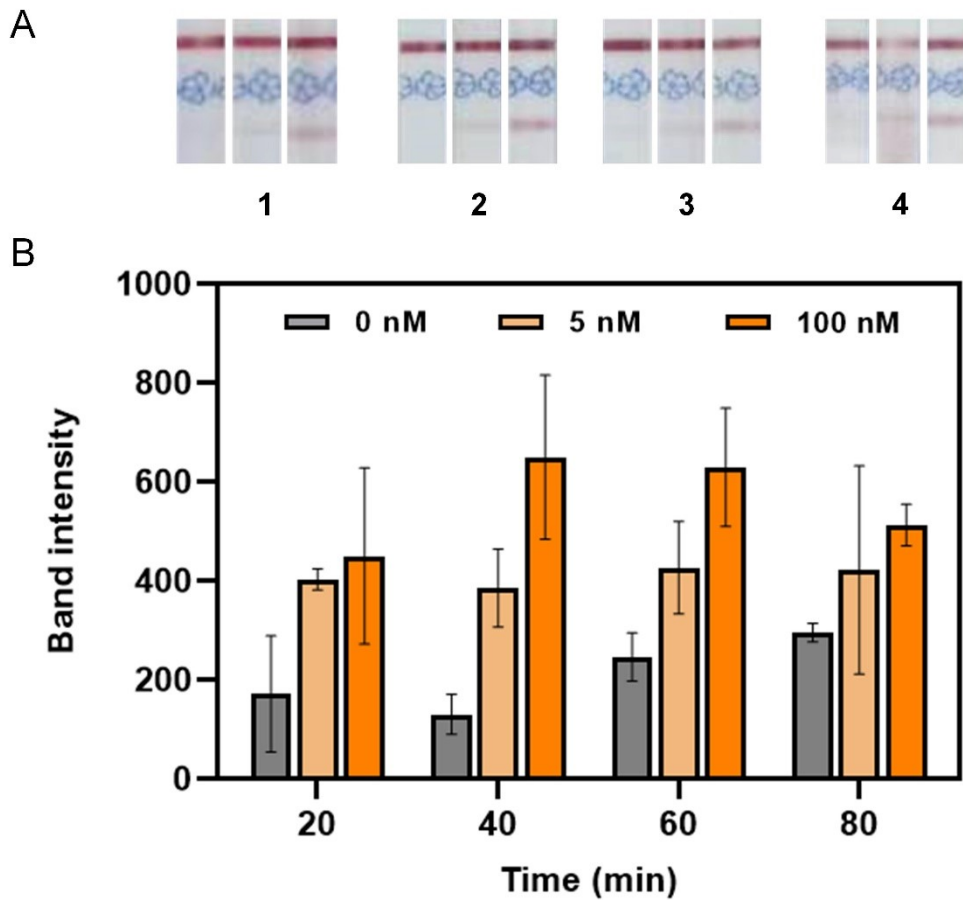

**Figure S7.** Optimization of cleavage time in CRISPR-PTS assay. (A) Comparison of band intensity observed by unaided eyes between different groups. No. 1 to No. 4 represented experimental groups with cleavage time ranging from 20 to 80 min, respectively (left: 0 nM dsDNA target; middle: 5 nM dsDNA target; right: 100 nM dsDNA target). (B) Comparison of band intensity observed by a test strip reader between different groups. This cleavage system contained 100 nM Cas12a, 200 nM crRNA, 0.5 U/ $\mu$ L RNase inhibitor, 1 $\times$ NEBuffer2.1 and 20  $\mu$ L hCG-modified beads, treated at 37  $^{\circ}$ C for different time. Three different kinds of dsDNA concentrations were tested in this experiment as mocked target (each column was the average of three repeated measurements; error bars represented the mean  $\pm$  S.D.).

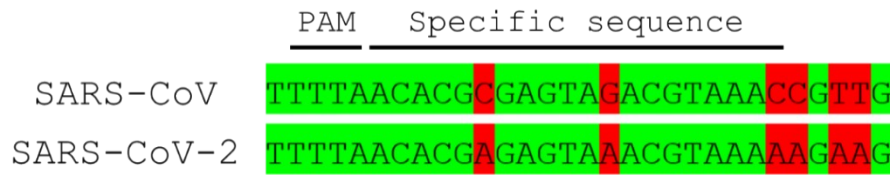

**Figure S8.** Genome sequence alignment of SARS-CoV and SARS-CoV-2. The protospacer adjacent motif (PAM) and specific sequence for Cas12a/crRNA recognition were both on the E gene of two viral strains. The red part of the sequence represented the significant difference between two viral types and was suitable for CRISPR Cas12a detection system.

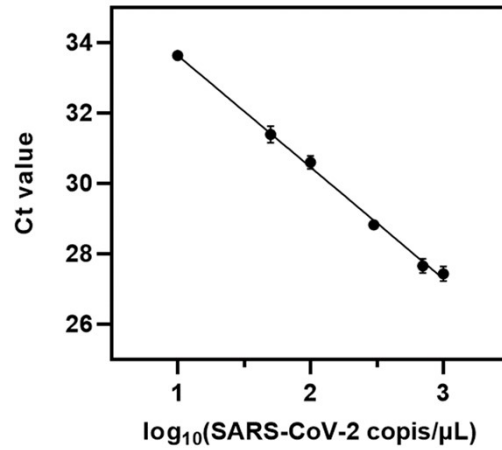

**Figure S9.** RT-qPCR standard curve of SARS-CoV-2 pseudovirus spiked throat swab samples. The picture showed the linear response of Ct values towards  $\log_{10}$  (pseudovirus final concentrations). The data was taken by three biological repetitions and error bars represent the mean  $\pm$  S.D.;  $R^2 = 0.993$ .

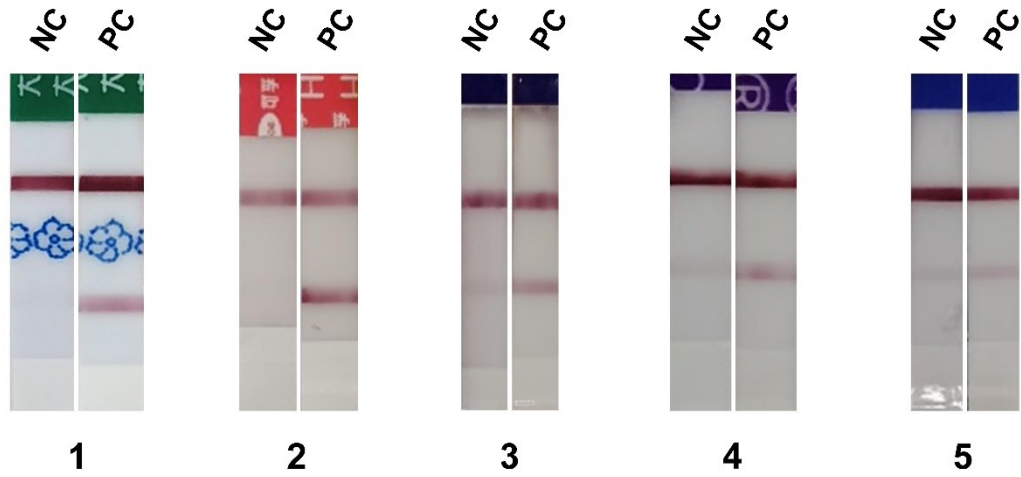

**Figure S10.** Comparison between strips from different brands using CRISPR-PTS assay (NC: template was RNase-free ddH<sub>2</sub>O; PC: template was throat swab samples mixed with pseudovirus at a final concentration of 100 copies/ $\mu$ L). The brands of commercial pregnancy test strips from group 1 to 5 were respectively David<sup>®</sup>, Cofee<sup>®</sup>, Wellday<sup>®</sup>, Yuting<sup>®</sup> and Hainuo<sup>®</sup>.

**Table S1.** Oligonucleotides used in this study.

| Name       | Sequence (5' start)                                               |
|------------|-------------------------------------------------------------------|
| N1-NTS     | CTGGTCCCCAAAATTTCTTGGGTTTGTCTGGACCAC<br>GTCTGCCGAAAG              |
| N1-TS      | CTTTCGGCAGACGTGGTCCAGAACAACCCAAGGAAA<br>TTTTGGGGACCAG             |
| N2-NTS     | CCTCAGCAGCAGATTTCTTAGTGACAGTTTGGCCTTGT<br>TGTTGTTGGCCT            |
| N2-TS      | AGGCCAACAACAACAAGGCCAAACTGTCACTAAGAAA<br>TCTGCTGCTGAGG            |
| E1-NTS     | AAGAATTCAGATTTTTAACACGAGAGTAAACGTAAAA<br>AGAAGGTTTTACA            |
| E1-TS      | TGTA AACCTTCTTTTTACGTTTACTCTCGTGTTAAAAA<br>TCTGAATTCTT            |
| E2-NTS     | TAGCGTACTTCTTTTTCTTGCTTTCGTGGTATTCTTGCT<br>AGTTACACTAG            |
| E2-TS      | CTAGTGTA ACTAGCAAGAATACCACGAAAGCAAGAAA<br>AAGAAGTACGCTA           |
| N1-crRNA-F | TAATACGACTCACTATAGGGTAATTTCTACTAAGTGTA<br>GATCTTGGGTTTGTCTGGACCA  |
| N1-crRNA-R | TGGTCCAGAACAACCCAAGATCTACACTTAGTAGAA<br>ATTACCCTATAGTGAGTCGTATTA  |
| N2-crRNA-F | TAATACGACTCACTATAGGGTAATTTCTACTAAGTGTA<br>GATTTAGTGACAGTTTGGCCTTG |
| N2-crRNA-R | CAAGGCCAAACTGTCACTAAATCTACACTTAGTAGAA<br>ATTACCCTATAGTGAGTCGTATTA |
| E1-crRNA-F | TAATACGACTCACTATAGGGTAATTTCTACTAAGTGTA<br>GATACACGAGAGTAAACGTAAAA |
| E1-crRNA-R | TTTTACGTTTACTCTCGTGTATCTACACTTAGTAGAAAT                           |

---

|               |                                                                   |
|---------------|-------------------------------------------------------------------|
|               | TACCCTATAGTGAGTCGTATTA                                            |
| E2-crRNA-F    | TAATACGACTCACTATAGGGTAATTTCTACTAAGTGTA<br>GATTTGCTTTCGTGGTATTCTTG |
| E2-crRNA-R    | CAAGAATACCACGAAAGCAAATCTACACTTAGTAGAA<br>ATTACCCTATAGTGAGTCGTATTA |
| E1-RT-RAA-F1  | CGGAAGAGACAGGTACGTTAATAGTTAATAGC                                  |
| E1-RT-RAA-R2  | AGACCAGAAGATCAGGAACTCTAGAAGAAT                                    |
| E1-RT-RAA-F3  | ATGTACTCATTTCGTTTCGGAAGAGACAGGTA                                  |
| E1-RT-RAA-R4  | GACCAGAAGATCAGGAACTCTAGAAGAATTCAGAT                               |
| E1-RT-RAA-F5  | TCGGAAGAGACAGGTACGTTAATAGTTAATAGCG                                |
| E1-RT-RAA-6F  | GTTTCGGAAGAGACAGGTACGTTAATAGTT                                    |
| SARS-CoV-E-F  | CAACGGTTTACGTCTACTCGCGTGTTAAA                                     |
| SARS-CoV-E-R  | TTTAACACGCGAGTAGACGTAAACCGTTG                                     |
| MERS-ORF1a-F  | TACGAGCCCACTACTCCCATTTTCGTCAG                                     |
| MERS-ORF1a-R  | CTGACGAAATGGGAGTAGTGGGCTCGTA                                      |
| MERS-upE-F    | CTCTGCGCTACTATGGGTCCCGTGTAGAG                                     |
| MERS-upE-R    | CTCTACACGGGACCCATAGTAGCGCAGAG                                     |
| MERS-ORF1b-F  | TCGATGTTGAGGGTGCTCATGCTTCCCGT                                     |
| MERS-ORF1b-R  | ACGGGAAGCATGAGCACCCCTCAACATCGA                                    |
| Reporter      | HEX-TTATTATTATTA-BHQ                                              |
| SH-DNA        | Thiol-(T) <sub>74</sub> -TCAGTGAATCGATCTAGTCAGTCAG                |
| Biotin-DNA    | Biotin-(T) <sub>74</sub> -CTGACTGACTAGATCGATTCACTGA               |
| RT-qPCR-F     | GGGGAACTTCTCCTGCTAGAAT                                            |
| RT-qPCR-R     | CAGACATTTTGCTCTCAAGCTG                                            |
| RT-qPCR-probe | FAM-TTGCTGCTGCTTGACAGATT-TARMA                                    |

---

The combination of [E1-RT-RAA-R2](#) and [E1-RT-RAA-6F](#) was the primer pair with the highest amplification efficiency.

**Table S2.** Validation of CRISPR-PTS assay using spiked throat swab samples.

| Sample ID         | Pseudovirus added final concentration (copies/ $\mu$ L) | CRISPR-PTS   |            | RT-qPCR      |            |
|-------------------|---------------------------------------------------------|--------------|------------|--------------|------------|
|                   |                                                         | TL intensity | Conclusion | Ct value     | Conclusion |
| 1                 | Non                                                     | 301.0        | -          | Undetermined | -          |
| 2                 | Non                                                     | 293.0        | -          | Undetermined | -          |
| 3                 | Non                                                     | 246.4        | -          | Undetermined | -          |
| 4                 | Non                                                     | 278.2        | -          | Undetermined | -          |
| 5                 | Non                                                     | 299.3        | -          | Undetermined | -          |
| 6                 | Non                                                     | 228.1        | -          | Undetermined | -          |
| 7                 | Non                                                     | 343.5        | -          | Undetermined | -          |
| 8 <sup>[1]</sup>  | Non                                                     | 383.9        | +          | Undetermined | -          |
| 9                 | Non                                                     | 255.6        | -          | Undetermined | -          |
| 10                | Non                                                     | 191.3        | -          | Undetermined | -          |
| 11                | Non                                                     | 209.9        | -          | Undetermined | -          |
| 12                | Non                                                     | 295.2        | -          | Undetermined | -          |
| 13                | Non                                                     | 290.3        | -          | Undetermined | -          |
| 14                | Non                                                     | 183.3        | -          | Undetermined | -          |
| 15                | Non                                                     | 256.9        | -          | Undetermined | -          |
| 16                | Non                                                     | 306.8        | -          | Undetermined | -          |
| 17                | Non                                                     | 232.7        | -          | 41.93        | -          |
| 18                | Non                                                     | 238.7        | -          | Undetermined | -          |
| 19                | Non                                                     | 239.6        | -          | Undetermined | -          |
| 20                | Non                                                     | 266.6        | -          | 40.20        | -          |
| 21 <sup>[2]</sup> | 1                                                       | 388.5        | +          | 36.55        | -          |
| 22                | 2.5                                                     | 429.8        | +          | 34.91        | +          |
| 23                | 4                                                       | 473.2        | +          | 34.34        | +          |



|    |      |        |   |       |   |
|----|------|--------|---|-------|---|
| 24 | 5    | 507.3  | + | 34.08 | + |
| 25 | 7.5  | 513.0  | + | 33.61 | + |
| 26 | 8    | 545.0  | + | 33.63 | + |
| 27 | 9    | 438.5  | + | 33.13 | + |
| 28 | 12.5 | 492.4  | + | 32.71 | + |
| 29 | 15   | 580.6  | + | 32.58 | + |
| 30 | 20   | 634.2  | + | 32.26 | + |
| 31 | 25   | 587.0  | + | 31.50 | + |
| 32 | 30   | 634.1  | + | 31.40 | + |
| 33 | 40   | 648.8  | + | 30.97 | + |
| 34 | 45   | 636.3  | + | 30.71 | + |
| 35 | 50   | 647.2  | + | 30.60 | + |
| 36 | 55   | 574.3  | + | 30.52 | + |
| 37 | 60   | 637.6  | + | 30.34 | + |
| 38 | 65   | 636.9  | + | 30.27 | + |
| 39 | 70   | 660.8  | + | 30.05 | + |
| 40 | 75   | 478.6  | + | 29.94 | + |
| 41 | 80   | 673.3  | + | 29.96 | + |
| 42 | 90   | 655.3  | + | 29.87 | + |
| 43 | 100  | 691.8  | + | 30.41 | + |
| 44 | 150  | 619.5  | + | 28.14 | + |
| 45 | 200  | 806.9  | + | 27.65 | + |
| 46 | 250  | 585.7  | + | 28.25 | + |
| 47 | 500  | 655.0  | + | 27.32 | + |
| 48 | 600  | 832.1  | + | 26.42 | + |
| 49 | 750  | 853.9  | + | 26.82 | + |
| 50 | 1250 | 751.2  | + | 26.28 | + |
| 51 | 1300 | 811.3  | + | 25.55 | + |
| 52 | 1500 | 1025.8 | + | 25.44 | + |

|    |      |       |   |       |   |
|----|------|-------|---|-------|---|
| 53 | 1800 | 916.2 | + | 25.30 | + |
| 54 | 2000 | 762.0 | + | 26.48 | + |

(-) Negative result; (+) Positive result.

[1]Sample No. 8 was actually negative control but appeared false-positive result.

[2]Sample No.21 was added with 1 copy/ $\mu$ L pseudovirus at final concentration. Single copy level of pseudovirus was not detected by RT-qPCR but detected by CRISPR-PTS assay established in this study.

**Table S3.** Comparison between CRISPR-PTS assay and RT-qPCR on various detection parameters

|                                | CRISPR-PTS assay                                                                                                                                                                                                       | RT-qPCR                                                                                                                                                                                                                          |
|--------------------------------|------------------------------------------------------------------------------------------------------------------------------------------------------------------------------------------------------------------------|----------------------------------------------------------------------------------------------------------------------------------------------------------------------------------------------------------------------------------|
| Target                         | E gene                                                                                                                                                                                                                 | ORF1ab, N gene                                                                                                                                                                                                                   |
| Technological process          | <ol style="list-style-type: none"> <li>1. Sample pretreatment (70 °C, 10 min)</li> <li>2. RT-RAA (42°C, 30 min)</li> <li>3. Cas12a cleavage (37 °C, 40 min)</li> <li>4. Strip signal readout (37 °C, 2 min)</li> </ol> | <ol style="list-style-type: none"> <li>1. Genome extraction (r.t., 1 h)</li> <li>2. Reverse transcription (50 °C,15 min)</li> <li>3. Denature (95 °C, 5 min)</li> <li>4. Amplification (95 °C, 10 s; 55 °C 40 s; *45)</li> </ol> |
| Sample-to-result time          | 82 min                                                                                                                                                                                                                 | 117.5 min                                                                                                                                                                                                                        |
| LOD                            | 1 copy per µl input                                                                                                                                                                                                    | 2.5 copies per µl input                                                                                                                                                                                                          |
| Assay results                  | Qualitative                                                                                                                                                                                                            | Quantitative                                                                                                                                                                                                                     |
| Material cost                  | 6.08 \$                                                                                                                                                                                                                | 11.04 \$                                                                                                                                                                                                                         |
| Bulky instrumentation required | No                                                                                                                                                                                                                     | Yes                                                                                                                                                                                                                              |
